# Supplementary material for: A New Statistical Approach to Characterize Chemical-Elicited Behavioral Effects in High-Throughput Studies Using Zebrafish
Source: PubMed Central journal article supplement (PMC5242475; doi:10.1371/journal.pone.0169408), 2017-01-18
Supplement: pone.0169408.s003.pdf [file pone.0169408.s003.pdf]

| Endpoint                                                                                                   | Concordance | RelativeRisk | FisherEnrichment |
|------------------------------------------------------------------------------------------------------------|-------------|--------------|------------------|
| SUB_dog_SystemicCarcinogenic_adult_OrganWeight_Nervous                                                     | 0.612       | 8.105        | 0.042            |
| SUB_mouse_SystemicCarcinogenic_adult_PathologyProliferative_PrimaryDigestive                               | 0.702       | 6.92         | 0.007            |
| SUB_mouse_SystemicCarcinogenic_adult_PathologyProliferative_PrimaryDigestive_Stomach                       | 0.695       | 5.932        | 0.017            |
| SUB_rat_SystemicCarcinogenic_adult_AccessoryDigestive_Pancreas                                             | 0.627       | 4.151        | 0.027            |
| CHR_rat_DevelopmentalReproductive_adult_PathologyNonProliferative_ReproductiveMale_Epididymis              | 0.662       | 4.119        | 0.015            |
| CHR_mouse_SystemicCarcinogenic_adult_PathologyGross_PrimaryDigestive_Stomach                               | 0.644       | 3.979        | 0.042            |
| CHR_rat_SystemicCarcinogenic_adult_PathologyNonProliferative_Lymphatic_LymphNode                           | 0.665       | 3.661        | 0.009            |
| CHR_rat_SystemicCarcinogenic_adult_PathologyNonProliferative_AccessoryDigestive_Pancreas                   | 0.665       | 3.661        | 0.009            |
| CHR_mouse_DevelopmentalReproductive_adult_PathologyGross_ReproductiveMale                                  | 0.644       | 3.411        | 0.036            |
| CHR_rat_SystemicCarcinogenic_adult_PathologyProliferative_PrimaryDigestive_Stomach                         | 0.659       | 3.295        | 0.041            |
| CHR_rat_DevelopmentalReproductive_adult_PathologyNonProliferative_ReproductiveMale_Prostate                | 0.659       | 3.295        | 0.041            |
| CHR_rat_SystemicCarcinogenic_adult_Lymphatic_LymphNode                                                     | 0.668       | 3.112        | 0.003            |
| CHR_rat_SystemicCarcinogenic_adult_OrganWeight_Respiratory                                                 | 0.662       | 2.975        | 0.016            |
| SUB_mouse_SystemicCarcinogenic_adult_PrimaryDigestive_Stomach                                              | 0.687       | 2.966        | 0.038            |
| MGR_rat_DevelopmentalReproductive_pregnancy_ReproductiveMating_ReproductivePerformance_GestationalInterval | 0.626       | 2.654        | 0.048            |
| SUB_dog_SystemicCarcinogenic_adult_OrganWeight_Urinary                                                     | 0.619       | 2.509        | 0.048            |
| CHR_mouse_SystemicCarcinogenic_adult_PathologyNonProliferative_Endocrine_AdrenalGland                      | 0.644       | 2.325        | 0.032            |
| MGR_rat_DevelopmentalReproductive_pregnancy_ReproductiveMating_OffspringSurvivalEarly_Livebirthindex       | 0.634       | 2.271        | 0.01             |
| SUB_rat_SystemicCarcinogenic_adult_OrganWeight_Cardiovascular                                              | 0.638       | 2.036        | 0.003            |
| CHR_rat_DevelopmentalReproductive_adult_ReproductiveFemale_Uterus                                          | 0.65        | 1.927        | 0.032            |
| CHR_mouse_SystemicCarcinogenic_adult_PathologyNonProliferative_Endocrine                                   | 0.637       | 1.885        | 0.035            |
| SUB_rat_SystemicCarcinogenic_adult_Cardiovascular_Heart                                                    | 0.62        | 1.707        | 0.014            |
| CHR_rat_DevelopmentalReproductive_adult_PathologyNonProliferative                                          | 0.638       | 1.664        | 0.028            |
| CHR_rat_SystemicCarcinogenic_adult_Cardiovascular_Heart                                                    | 0.638       | 1.659        | 0.037            |
| CHR_rat_SystemicCarcinogenic_adult_OtherSystemic_InLifeObservations_FoodConsumption                        | 0.635       | 1.638        | 0.025            |
| CHR_rat_SystemicCarcinogenic_adult_Nervous_Brain                                                           | 0.635       | 1.609        | 0.04             |
| CHR_rat_SystemicCarcinogenic_adult_Respiratory_Lung                                                        | 0.629       | 1.556        | 0.038            |
| MGR_rat_DevelopmentalReproductive_pregnancy_ReproductiveMating_OffspringSurvivalEarly                      | 0.608       | 1.548        | 0.02             |
| CHR_mouse_SystemicCarcinogenic_adult_PathologyGross                                                        | 0.607       | 1.471        | 0.029            |
| SUB_rat_SystemicCarcinogenic_adult_OtherSystemic_InLifeObservations_ClinicalSigns                          | 0.594       | 1.451        | 0.012            |
| CHR_mouse_SystemicCarcinogenic_adult_PathologyNonProliferative_AccessoryDigestive_Liver                    | 0.578       | 1.337        | 0.031            |
| DEV_rat_SystemicCarcinogenic_adult_OtherSystemic_InLifeObservations_ClinicalSigns                          | 0.557       | 1.319        | 0.003            |
| CHR_mouse_SystemicCarcinogenic_adult_OrganWeight_AccessoryDigestive                                        | 0.571       | 1.312        | 0.042            |
| CHR_rat_SystemicCarcinogenic_adult_OrganWeight_AccessoryDigestive                                          | 0.56        | 1.278        | 0.039            |
| MGR_rat_SystemicCarcinogenic_juvenile_OtherSystemic_InLifeObservations_BodyWeight                          | 0.506       | 1.194        | 0.006            |
| MGR_rat_SystemicCarcinogenic_juvenile_OtherSystemic_InLifeObservations                                     | 0.498       | 1.174        | 0.012            |
| CHR_rat_SystemicCarcinogenic_adult_PathologyNonProliferative                                               | 0.482       | 1.164        | 0.026            |
| DEV_rat_SystemicCarcinogenic_adult_OtherSystemic_InLifeObservations                                        | 0.443       | 1.104        | 0.032            |
